# Supplementary material
Source: MDPI journal article supplement (https://www.mdpi.com/2036-7449/16/2/19)
Supplement: s1 [file s1]

# **Risk factors of HIV late presentation in a single Belgian reference center**

## **Authors**

Damien Scaia <sup>1,\*</sup>, Karine Fombellida <sup>2</sup>, Nathalie Maes <sup>3</sup>, Majdouline El Moussaoui <sup>2</sup>, and Gilles Darcis <sup>2,\*</sup>

## **Affiliation**

1 Public Health Science Department, University of Liège, 4000 Liège, Belgium

2 Infectious Diseases Department, Liège University Hospital, 4000 Liège, Belgium

3 Biostatistics and Research Method Center, Liège University Hospital, 4000 Liège, Belgium

# Supplementary information

**Table S1.** Presentation for care: evolution over time (n=167)

| Year of presentation for care | Number of individuals | N (%)<br>LP <sup>1</sup> | N (%)<br>LP-AD <sup>2</sup> |
|-------------------------------|-----------------------|--------------------------|-----------------------------|
| 2018                          | 39                    | 15 (38.5)                | 11 (28.2)                   |
| 2019                          | 41                    | 19 (46.3)                | 10 (24.4)                   |
| 2020                          | 31                    | 11 (35.5)                | 5 (16.1)                    |
| 2021                          | 27                    | 9 (33.3)                 | 5 (18.5)                    |
| 2022                          | 29                    | 10 (34.5)                | 5 (17.2)                    |
| p-value <sup>3</sup>          |                       | 0.80                     | 0.73                        |

<sup>1</sup> CD4 T cells <350/mm<sup>3</sup> or an AIDS-defining event (at any CD4) in the six months following first visit

<sup>2</sup> CD4 T cells <200/mm<sup>3</sup> or an AIDS-defining event (at any CD4) in the six months following first visit

<sup>3</sup> Logistic regression

**Table S2.** Groups in the cohort (n=167)

|                     | Origin      |                    |             |
|---------------------|-------------|--------------------|-------------|
|                     | Belgium     | Sub-Saharan Africa | Others      |
| Heterosexual men    | 12 (7.19%)  | 16 (9.58%)         | 2 (1.20%)   |
| Heterosexual women  | 7 (4.19%)   | 33 (19.76%)        | 1 (0.60%)   |
| Homo/Bisexual men   | 34 (20.36%) | 13 (7.78%)         | 22 (13.17%) |
| Homo/Bisexual women | 0 (0%)      | 0 (0%)             | 0 (0%)      |
| Others              | 6 (3.59%)   | 13 (7.78%)         | 8 (4.79%)   |

**Table S3.** Mode of acquisition among men (n=118)

|                    | Mode of acquisition       |                            |                |
|--------------------|---------------------------|----------------------------|----------------|
|                    | Heterosexual transmission | Homo/Bisexual transmission | Others/Unknown |
| Origin             |                           |                            |                |
| Belgium            | 12 (10.17%)               | 34 (28.81%)                | 6 (5.09%)      |
| Sub-Saharan Africa | 16 (13.56%)               | 13 (11.02%)                | 6 (5.09%)      |
| Others             | 2 (1.70%)                 | 22 (18.64%)                | 7 (5.93%)      |

**Table S4.** Homo/Bisexual transmission by gender and origin (n=69)

|        | Origin      |                    |             |
|--------|-------------|--------------------|-------------|
|        | Belgium     | Sub-Saharan Africa | Others      |
| Gender |             |                    |             |
| Male   | 34 (49.28%) | 13 (18.84%)        | 22 (31.88%) |
| Female | 0 (0%)      | 0 (0%)             | 0 (0%)      |

**Table S5.** Heterosexual transmission by gender and origin (n=71)

|        | Origin      |                    |           |
|--------|-------------|--------------------|-----------|
|        | Belgium     | Sub-Saharan Africa | Others    |
| Gender |             |                    |           |
| Male   | 12 (16.90%) | 16 (22.54%)        | 2 (2.82%) |
| Female | 7 (9.86%)   | 33 (46.48%)        | 1 (1.41%) |

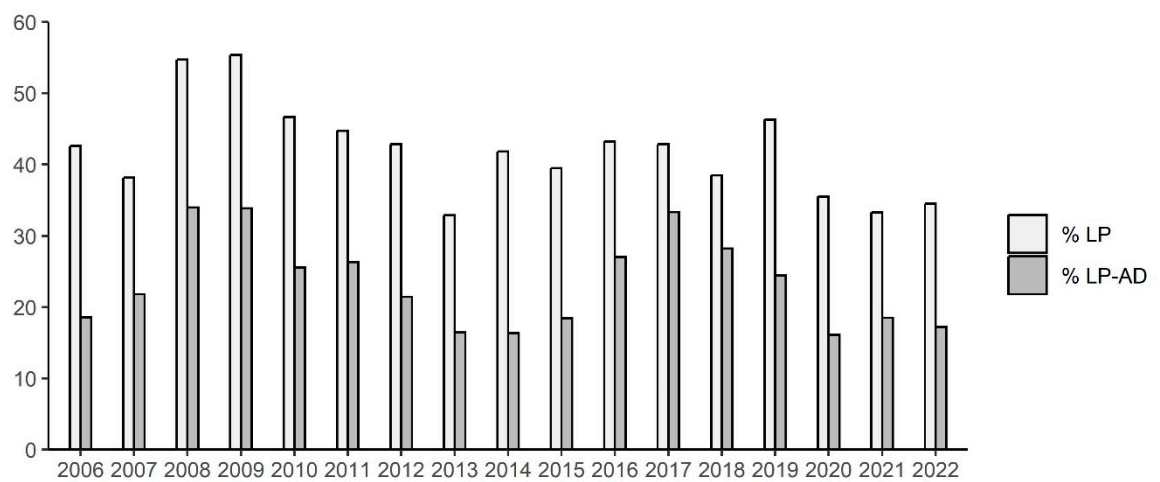**Figure S1.** Evolution of LP and LP-AD rates over time
